# Supplementary material for: The immune response to Covid-19 mRNA vaccination among Lymphoma patients receiving anti-CD20 treatment
Source: PubMed Central journal article supplement (PMC11408186; doi:10.3389/fimmu.2024.1433442), 2024-09-04
Supplement: DataSheet1.pdf [file DataSheet1.pdf]

## Supplementary Data

**Table S1. Comparison of peak T cell response to spike protein peptides.**

| Variable                                                                                       | Pearson correlation with peak T cell | P value | 95% confidence interval |
|------------------------------------------------------------------------------------------------|--------------------------------------|---------|-------------------------|
| Number of days between the last rituximab administration date and vaccine administration date. | -0.0636                              | 0.6261  | (-0.3737, 1.0000)       |
| Age                                                                                            | -0.2642                              | 0.9314  | (-0.5161, 1.0000)       |

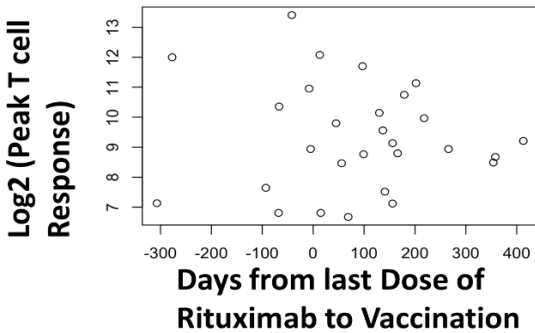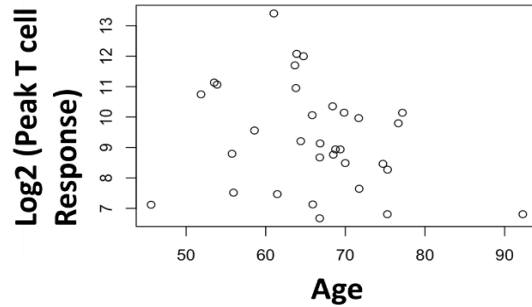

**Left;** Scatter plot comparing peak T cell INFg response to re-stimulation with Spike peptides and the number of days between the last Rituximab dose and first Covid-19 vaccination. **Right;** Scatter plot comparing peak T cell INFg response to re-stimulation with Spike peptides and patient age.

### **CD4 T cell Response**

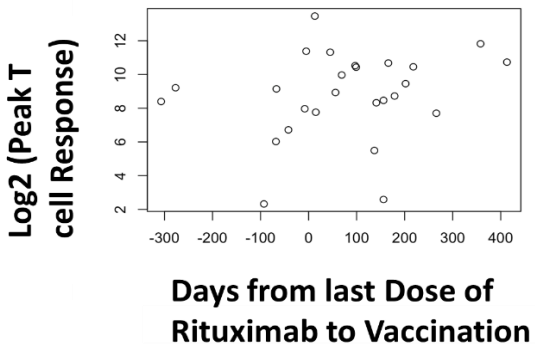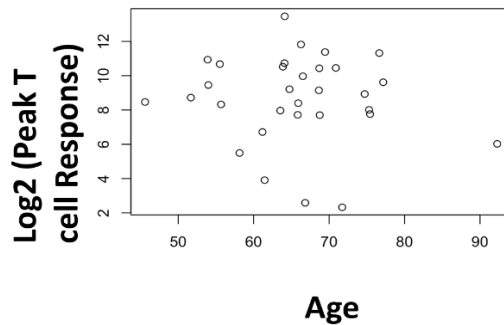

**Left;** Scatter plot comparing peak T cell INFg response to re-stimulation with Spike peptides and the number of days between the last Rituximab dose and first Covid-19 vaccination. **Right;** Scatter plot comparing peak T cell INFg response to re-stimulation with Spike peptides and patient age.

**Table S2. Comparison of peak CD4 T cell response vs Timing of rituximab administration and Covid-19 vaccination.**

| Variable                                                                                       | Pearson correlation with peak T cell | P value | 95% confidence interval |
|------------------------------------------------------------------------------------------------|--------------------------------------|---------|-------------------------|
| Number of days between the last rituximab administration date and vaccine administration date. | 0.2170                               | 0.1434  | (-0.1218, 1.0000)       |
| Age                                                                                            | -0.1019                              | 0.7073  | (-0.3911, 1.0000)       |

**Table S3. Comparison of peak CD4 T cell response.**

| <b>Table</b>           | <b>Log 2 (Peak CD4 T cell Response)</b> | <b>P value</b> |
|------------------------|-----------------------------------------|----------------|
| Controls               | 8.0358±2.6483                           | 0.5921         |
| Patients               | 8.7680±2.5970                           |                |
| Female                 | 9.2715±1.7886                           | 0.2243         |
| Male                   | 8.2010±2.9890                           |                |
| Moderna                | 9.4659±2.5349                           | 0.0521         |
| Pfizer                 | 7.6591±2.3759                           |                |
| Controls (Whole Spike) | 4.0934±2.7596                           | 0.9480         |
| Patients (Whole Spike) | 4.1885±3.4056                           |                |
| Controls (RBD)         | 1.6951±2.8092                           | 0.5301         |
| Patients (RBD)         | 2.6274±3.1665                           |                |

**Table S3. Comparison of Peak T cell response.** Peak T cell responses are log2 transformed to reduce skewness. A two-sample t-test was used to compare peak T cell response between patients and controls, Females and Males, or Vaccine (Pfizer vs. Moderna) when PBMC are restimulated with overlapping peptides, and control vs. patient when PBMC are re-stimulated with whole spike protein, or with the Receptor Binding Domain protein.

**Table S4. A comparison of antibody induction and analysis of correlation between IgA and IgG.**

|         | Immunoglobulin | Variable | beta    | Standard Error | P value |
|---------|----------------|----------|---------|----------------|---------|
| Vaccine | IgG            | Pfizer   | -0.5167 | 1.2857         | 0.6912  |
|         | IgA            | Pfizer   | 0.0336  | 0.9416         | 0.9718  |
| Gender  | IgG            | Male     | 0.965   | 1.2264         | 0.4389  |
|         | IgA            | Male     | 0.5157  | 0.8991         | 0.5717  |

**Table S4.** Both IgG and IgA were log2 transformed to reduce skewness. Two mixed effects models were fitted to compare vaccine differences in IgG and IgA respectively, and two mixed effects models were fitted to compare gender differences in IgG and IgA respectively. In all 4 models, the random effect was the individual person. The results of the 4 models are summarized. No vaccine or gender difference comparing IgG or IgA induction was statistically significant. **Graph:** All IgA and IgG measures from blood samples drawn before the booster vaccination. For patients who received only one vaccine, all their blood samples were used. The Spearman correlation between IgA and IgG is  $R=0.7457$ . These data are plotted in black "x" below.

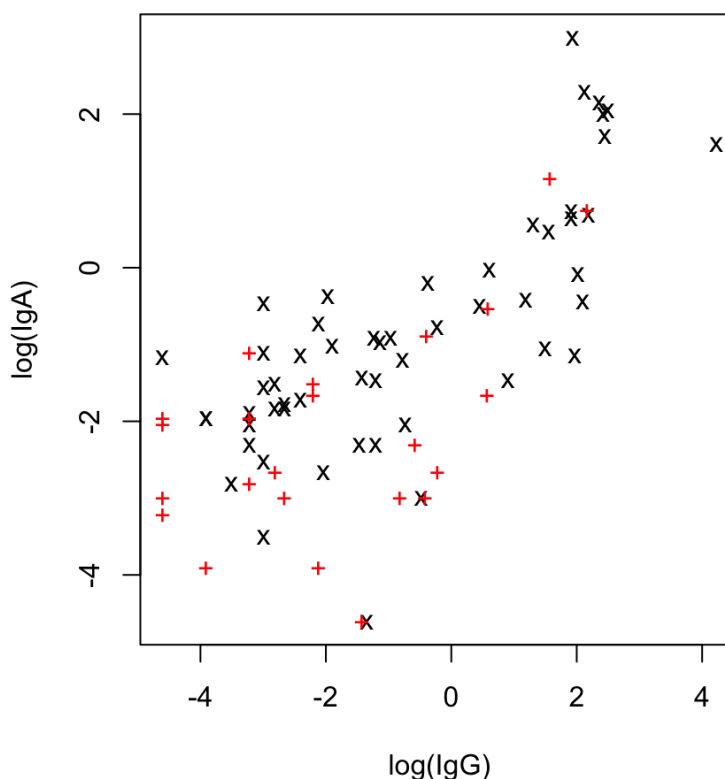

Individuals receiving sample: all IgA and IgG measures from blood samples drawn after the first vaccine. Only patients who received the second vaccine were included. The Spearman correlation between IgA and IgG is  $R=0.5043$ . These data are plotted in red "+" below.

The reason for using a Spearman correlation is because both IgA and IgG data are highly skewed.

**Table S5. Comparison of patient with control response to individual peptide pools that cover the vaccine immunogen spike protein.**

|        | Prop. Control | Prop. Patient | P value Fisher | beta regression | Std err regression | P value regression |
|--------|---------------|---------------|----------------|-----------------|--------------------|--------------------|
| Pool 1 | 0.2000        | 0.3462        | 1.0000         | 0.7475          | 1.1975             | 0.5325             |
| Pool 2 | 0.4000        | 0.6538        | 0.3499         | 1.0414          | 1.0018             | 0.2986             |
| Pool 3 | 0.2000        | 0.6154        | 0.1484         | 1.9628          | 1.2336             | 0.1116             |
| Pool 4 | 0.2000        | 0.5385        | 0.3326         | 1.5438          | 1.1893             | 0.1943             |
| Pool 5 | 0.2000        | 0.2692        | 1.0000         | 0.3808          | 1.2071             | 0.7524             |
| Pool 6 | 0.4000        | 0.3077        | 1.0000         | -0.4031         | 1.0074             | 0.6890             |
| Pool 7 | 0.4000        | 0.6154        | 0.6254         | 0.8729          | 0.9996             | 0.3825             |
| Pool 8 | 0.2000        | 0.3846        | 0.6310         | 0.9310          | 1.1925             | 0.4350             |
| Pool 9 | 0.4000        | 0.2308        | 0.5831         | -0.7953         | 1.0263             | 0.4384             |

**Table S5. A comparison of patient with control response to individual peptide pools that cover the vaccine immunogen spike protein.** A  $\log_2(x+1)$  transformation was applied to the breath (total of the 9 pools) to reduce skewness. We fitted data using a mixed effects model with group (patient or control) as a fixed effect and patient ID as random effect. The estimated fixed effect of the group is  $\beta = -1.955 \pm 1.488$  ( $p = 0.1930$ ). Data are dichotomized by  $\geq 40$  or  $< 40$ . We use two methods to compare each of these nine pools between cases (patients) and controls: (1) Fisher's exact test; (2) logistic regression that adjusts for gender. Prop Control=proportion of controls with pool values 40 or above; Prop Patient=proportion of patients with pool values 40 or above. P value Fisher= p value from Fisher's exact test. Beta regression=coefficient from logistic regression for cases (vs controls). St.dev regression=standard error of Beta regression. P value regression = p value from the logistic regression.

**Table S6. Description of treatment regimens for patients participating in the study.**

| ID# | Disease     | Regimen Before Study                                                                                                | Regimen on Study                                                                                        | Covid Infection (day) by History | Death  | Total Ritux cycles on study |
|-----|-------------|---------------------------------------------------------------------------------------------------------------------|---------------------------------------------------------------------------------------------------------|----------------------------------|--------|-----------------------------|
| 1   | CLL         | ibrutinib+rituximab, R-Bendax2 cycles                                                                               | Venetoclax                                                                                              | none                             | No     | 0                           |
| 2   | MCL         | R-DHAP (substitute oxaliplatin for cisplatin), Autologous Hematopoietic Cell Transplantation, Maintenance Rituximab | Maintenance Rituximab every 8 weeks                                                                     | none                             | No     | 6                           |
| 3   | BCL         | Rituximab every week for 4 weeks, then rituximab every 3 months                                                     | Rituximab every 3 months                                                                                | 701                              | No     | 1                           |
| 4   | MZL         | rituximab weekly x 8 cycles, then maintenance rituximab every 60days                                                | Promacta                                                                                                | 380                              | No     | 3                           |
| 5   | MZL         | Rituximab induction, maintenance Rituximab every 90 days                                                            | Rituximab reinduction                                                                                   | none                             | No     | 4                           |
| 6   | DLBCL/PCNSL | none                                                                                                                | Rituximab every 90 days                                                                                 | 565                              | No     | 2                           |
| 7   | MCL         | NCTNEA4181 - Arm B Bendamustine, Rituximab, High Dose Cytarabine and Acalabrutinib (BR/CR-A)                        | R-Benda+ Acalabrutinib, R-HiDAC + Acalabrutinib --> CR, Arm B- Rituximab only (wanted the drug locally) | none                             | No     | 5                           |
| 8   | DLBCL/PCNSL | HD MTX+ Rituximab + Temozolomide x 8 cycles, then HD MTX+Rituximab maintenance                                      | HD MTX+Rituximab maintenance every month                                                                | none                             | No     | 7                           |
| 9   | DLBCL/PCNSL | None                                                                                                                | R-CHOP and high-dose methotrexate, 6 cycles of J18168, Yescarta CAR T-cell infusion                     | 239                              | 537    | 4                           |
| 10  | DLBCL       | HD MTX+Rituximab+Temozolomide, then maintenance Rituximab every 8 weeks                                             | None                                                                                                    | none                             | No     | 0                           |
| 11  | DLBCL/PCNSL | R-CHOP                                                                                                              | None                                                                                                    | none                             | No     | 0                           |
| 12  | BCL*        | Rituximab induction, Rituximab re-induction again, Rituximab re-induction again                                     | None                                                                                                    | none                             | No     | 0                           |
| 13  | CLL         | Rituximab every 3 months                                                                                            | Rituximab every 3 months                                                                                | 620                              | No     | 4                           |
| 14  | FL          | Rituxumab every 21 days                                                                                             | R-CHOP                                                                                                  | none                             | No     | 4                           |
| 15  | PT-LPD      | Pentostatin, rituximab induction, rituximab re-induction                                                            | None                                                                                                    | 61                               | No     | 0                           |
| 16  | HCL         | Rituximab induction                                                                                                 | None                                                                                                    | none                             | No     | 0                           |
| 17  | HCL         | HD MTX+ Rituximab every 3 weeks                                                                                     | HD MTX+ Rituximab every 3 weeks, TMZ. HD Ara-C, ASCT with BCNU/thiotepa                                 | 490                              | No     | 8                           |
| 18  | FL          | rituximab induction, maintenance rituximab, re-induction and maintenance rituximab                                  | Venetoclax                                                                                              | none                             | No     | 0                           |
| 19  | CLL         | rituximab induction, rituximab maintenance every 90 days, re-induction and maintenance rituximab.                   | Venetoclax                                                                                              | 636                              | No     | 0                           |
| 20  | CLL         | Rituximab induction, single infusion of rituximab maintenance                                                       | Ibrutinib                                                                                               | 546                              | No     | 0                           |
| 21  | CLL         | 2-CDA, pentostatin, rituximab induction, rituximab maintenance                                                      | None                                                                                                    | 504                              | No     | 0                           |
| 22  | HCL         | R-CHOP, RICE, autologous peripheral blood stem cell transplant with BEAM conditioning                               | None                                                                                                    | none                             | No     | 0                           |
| 23  | DLBCL       | RCHOP x1 , DA-R-EPOCH x1 and IT Ara-C x2 and MR-CHOP x4                                                             | None                                                                                                    | none                             | No     | 0                           |
| 24  | BCL         | None                                                                                                                | HD MTX+Rituximab every 3 weeks                                                                          | Not known                        | No     | 9                           |
| 25  | CLL         | Rituximab maintenance; Acalabrutinib 100 mg daily                                                                   | Acalabrutinib 100 mg daily for 1 month on study, Venetoclax and IVIG                                    | 669                              | No     | 0                           |
| 26  | MZL         | None                                                                                                                | Rituximab induction x4 doses, IVIG                                                                      | none                             | No     | 4                           |
| 27  | FL          | R-Bendamustine 6 cycles                                                                                             | None                                                                                                    | Before vaccine                   | No     | 0                           |
| 28  | MCL         | R-Benda, R-DHAOx4 cycles, Ibrutinib/Venetoclax, NMA Mismatch Unrelated Donor BMT, Promacta                          | Promacta                                                                                                | none                             | Mar-01 | 0                           |
